# Supplementary material for: Conserved Outer Tegument Component UL11 from Herpes Simplex Virus 1 Is an Intrinsically Disordered, RNA-Binding Protein
Source: PubMed Central journal article supplement (PMC7403781; doi:10.1128/mbio.00810-20), 2020-05-05
Supplement: mBio.00810-20-sf001.pdf [file mBio.00810-20-sf001.pdf]

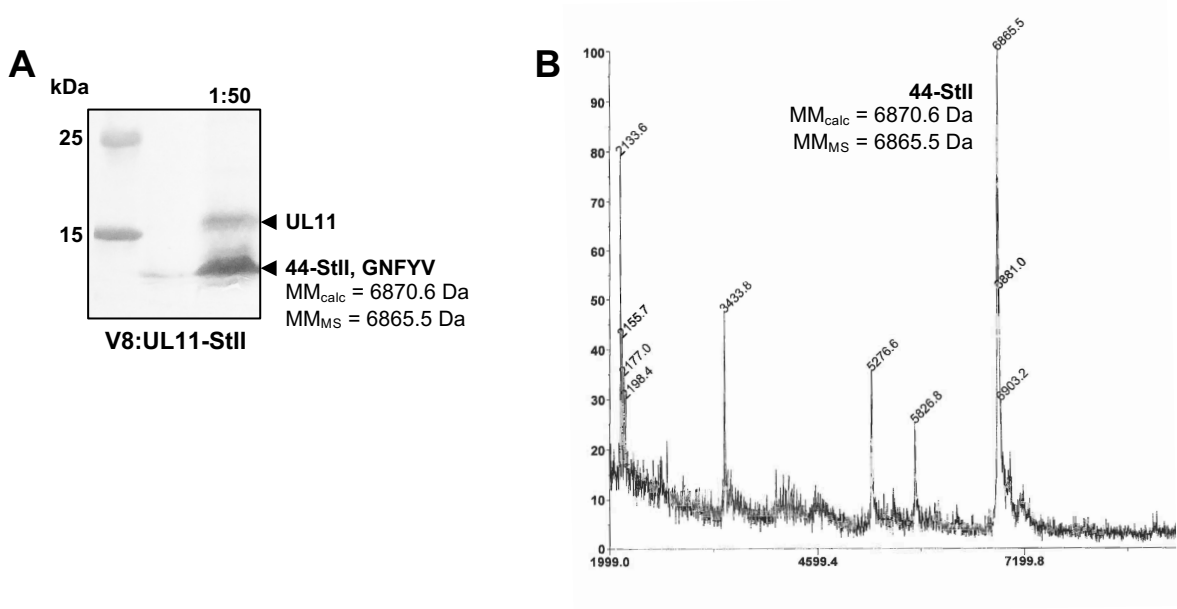

**Fig. S1. Identification of V8 proteolytic fragments.** (A) Limited proteolysis of UL11-StII with V8 protease. N-terminal sequence of the major proteolytic fragment is shown along with the molecular masses calculated from the sequence ( $MM_{calc}$ ) and determined by mass spectrometry ( $MM_{MS}$ ). (B) MALDI-TOF mass spectrometry analysis of the same digest. The x axis shows mass to charge ratio ( $m/z$ ) in Da and the y axis shows relative abundance (%) scaled for the mass range in x. Molecular mass ( $MM_{MS}$ ) of the major peak is shown along with the mass calculated from the sequence ( $MM_{calc}$ ).
