# Supplementary material for: Conserved Outer Tegument Component UL11 from Herpes Simplex Virus 1 Is an Intrinsically Disordered, RNA-Binding Protein
Source: PubMed Central journal article supplement (PMC7403781; doi:10.1128/mbio.00810-20), 2020-05-05
Supplement: mBio.00810-20-st001.pdf [file mBio.00810-20-st001.pdf]

**Table S1. Primers used to generate UL11 constructs.**

| Primer | Sequence                                                 | Description                                    |
|--------|----------------------------------------------------------|------------------------------------------------|
| AK34   | 5'- AAAGGAAGGGAAGAAAGCGAAA-3'                            | pET downstream primer, reverse                 |
| AK37   | 5'- ATACCGCGAAAGGTTTTGCG-3'                              | pET upstream primer, forward                   |
| CM121  | 5'-TAATCGATT <u>ACCATGGGCCTCTCGTTCTCC</u> -3'            | UL11 N-terminus, forward, NcoI site underlined |
| CM122  | 5'-GGGATCTAGT <u>CTCGAGTTATTATTCGCTATCGGACATGGGG</u> -3' | UL11 C-terminus, reverse, XhoI site underlined |
| CM131  | 5'-AAATTGTGGGTGGCTCCACTCGCTATCGGACATGGG-3'               | UL11-StII, SOE internal reverse                |
| CM132  | 5'-CACCCACAATTTGAGAAGTAATA <u>ACTCGAGCGGCC</u> -3'       | UL11-StII, SOE internal forward                |
| CM136  | 5'-TGGGTGGCTCCAACGCAGGCGCTG-3'                           | UL11(1-65)-StII, SOE internal reverse          |
| CM137  | 5'-CAGCGCCTGCGTTGGAGCCACCCA-3'                           | UL11(1-65)-StII, SOE internal forward          |
| pGEX3  | 5'-GTCAGAGGTTTTACCGTCAT-3'                               | pGEX downstream primer, reverse                |
| pGEX5  | 5'-ATAGCATGGCCTTTGCAGGGCT-3'                             | pGEX upstream primer, forward                  |
